# Supplementary material for: Comprehensive increase in CO 2 release by drying-rewetting cycles among Japanese forests and pastureland soils and exploring predictors of increasing magnitude
Source: Copernicus journal article supplement (doi:10.5194/egusphere-2024-419), 2024-04-09
Supplement: Supplementary file 1 [file egusphere-2024-419-supplement.pdf]

Fig. S1

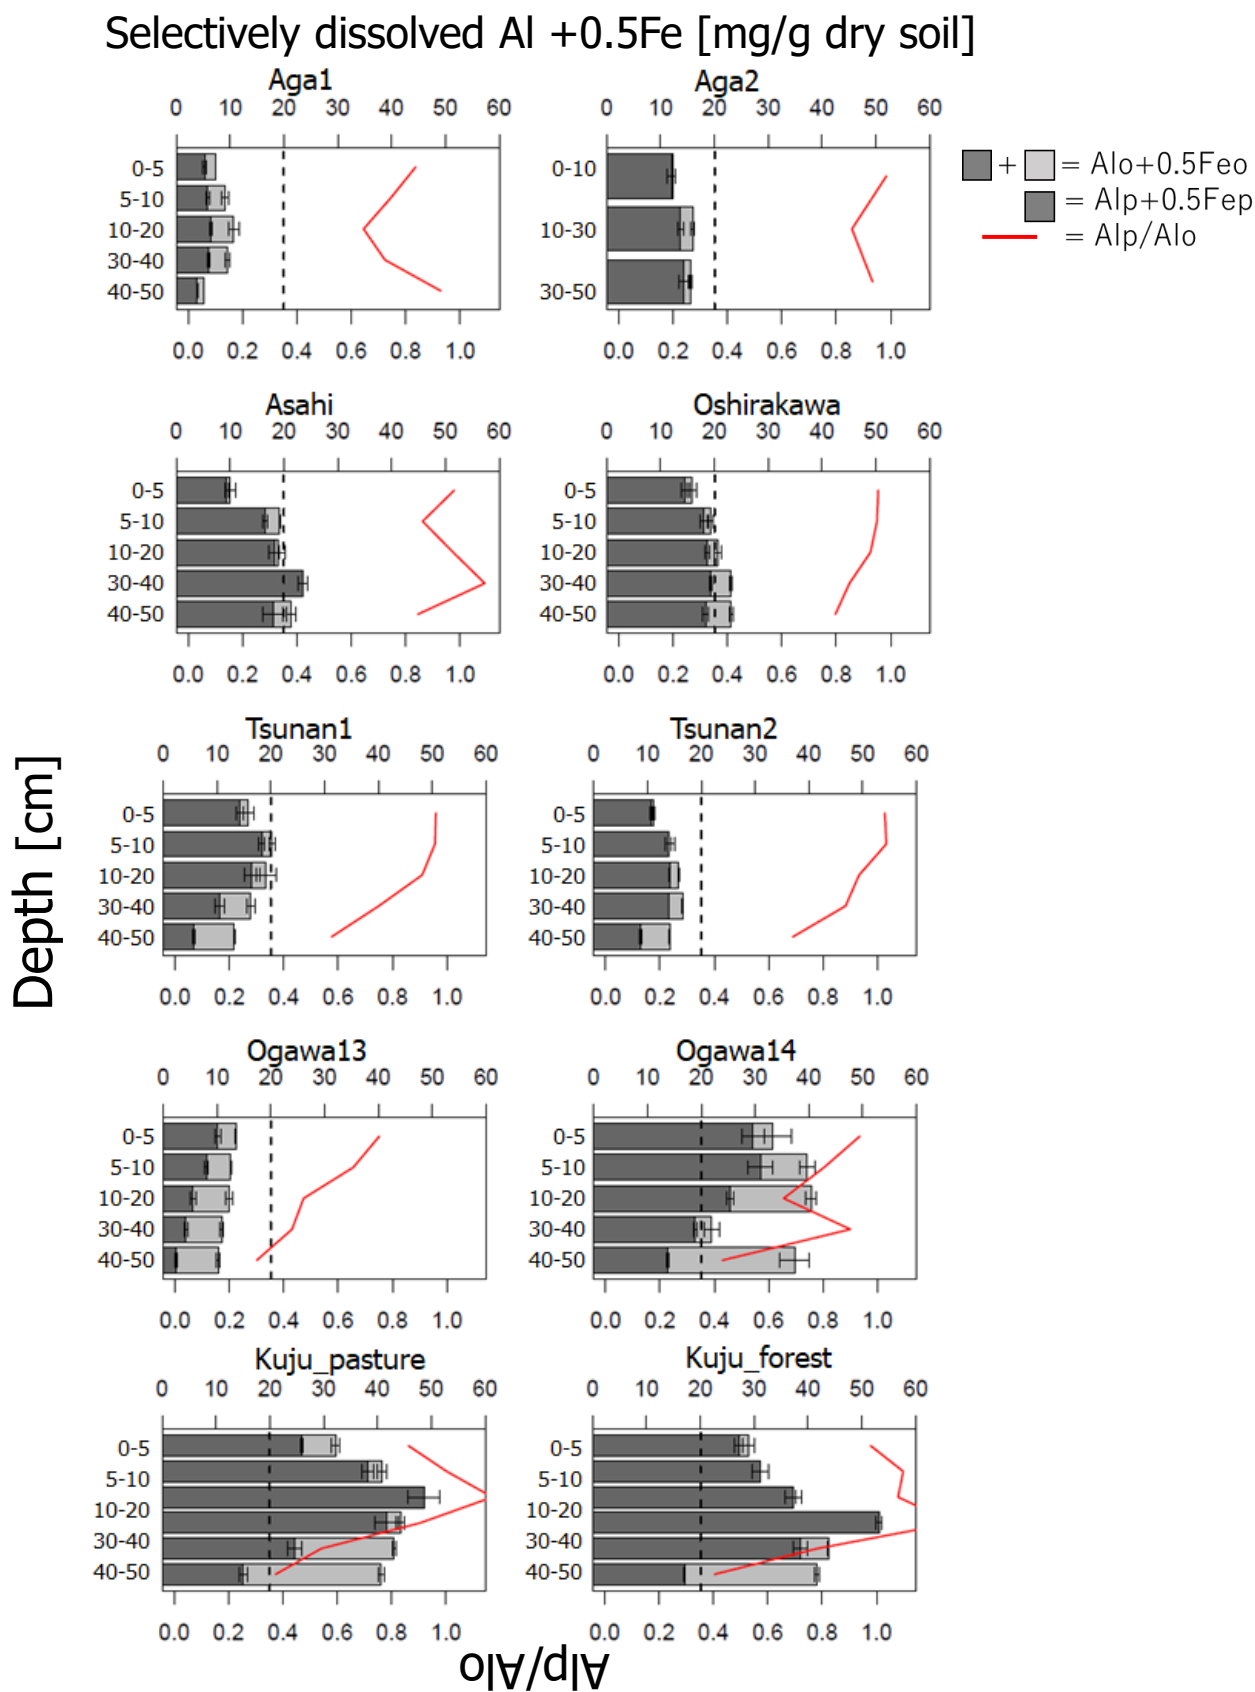

Fig. S1. Vertical profiles of selectively dissolved Al + 0.5Fe contents ( $\text{Al}_\text{o} + 0.5\text{Fe}_\text{o}$ ,  $\text{Al}_\text{p} + 0.5\text{Fe}_\text{p}$ ) and  $\text{Al}_\text{p}/\text{Al}_\text{o}$  for soils from 0 to 50cm depth.

Fig. S2

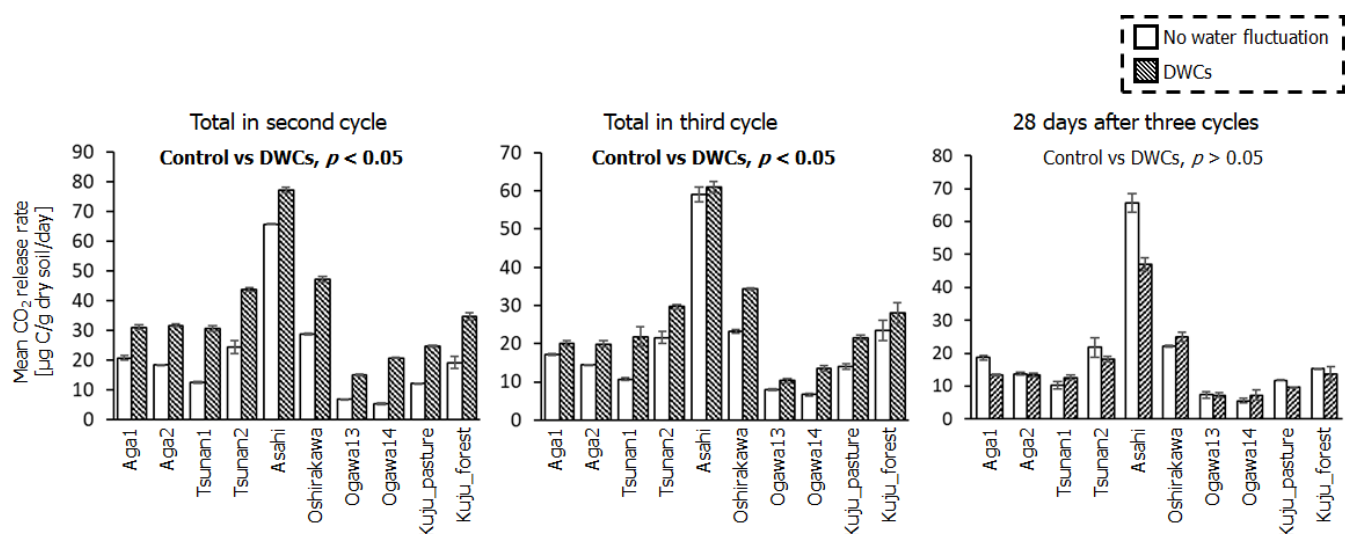

Fig. S2. Comparisons of mean CO<sub>2</sub> release rate for second cycle, third cycle, and the post 28-days incubation after the three cycles between DWCs and continuously constant moisture conditions. Statistically significant differences ( $p < 0.05$  by pairwise t-test) in CO<sub>2</sub> release rate between two treatments were also presented.

Fig. S3

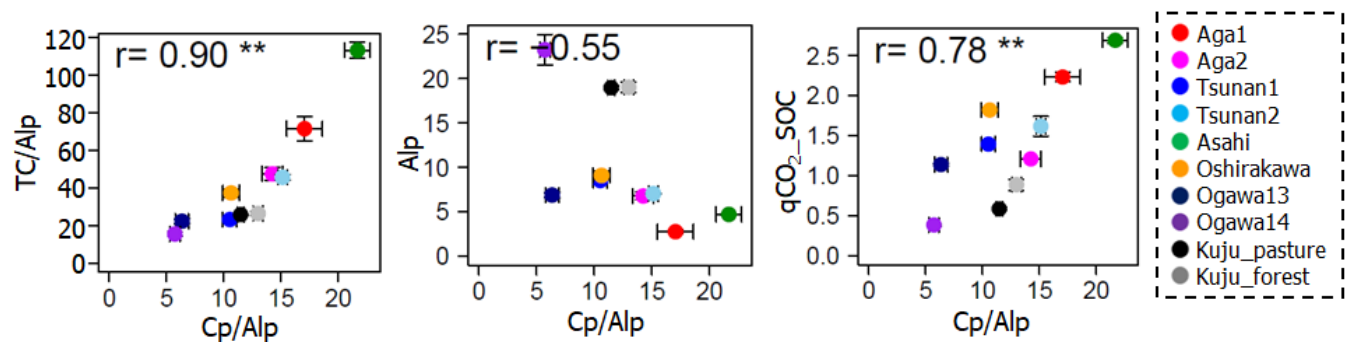

Fig. S3. Relations among soil Alp contents, Cp to Alp molar ratio, and qCO<sub>2</sub>\_soc. Statistically significant correlation coefficients at  $p < 0.01$  and  $p < 0.05$  are presented with single (\*) and double asterisks (\*\*), respectively.

Fig. S4

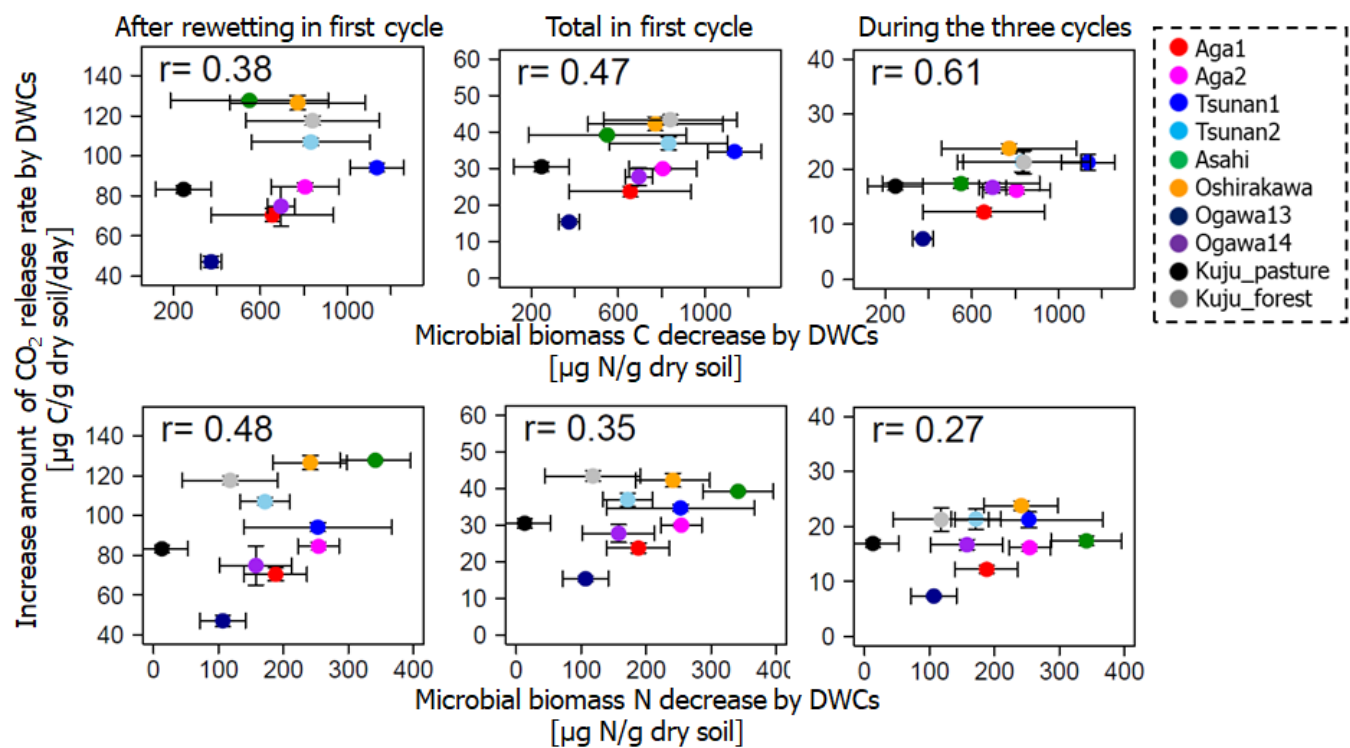

Fig. S4. Relations between the amount of CO<sub>2</sub> release increase and the microbial biomass C or N decrease by dry-wet cycles. There was no relationship showing significant correlation ( $p > 0.05$ ).
